# Supplementary material for: Generation of Therapeutically Potent Spheroids from Human Endometrial Mesenchymal Stem/Stromal Cells
Source: MDPI journal article supplement (doi:10.3390/jpm11060466), 2021-05-25
Supplement: s1 [file s1]

**Supplementary Materials:**

**Table S1.** Primer sequences for control and target genes and Q-PCR conditions.

| Symbol | Primer sequence                                                    | Amplification conditions           | PCR productsize (bp) | Accession number               | Reference |
|--------|--------------------------------------------------------------------|------------------------------------|----------------------|--------------------------------|-----------|
| TSG-6  | S: GATGGATGGCTAAGGGCAGAGT-3'<br>AS: TCATTTGGGAAGCCTGGAGATT-3'      | 93°C, 20 s, 61°C,<br>20 s72°C 30 s | 208                  | <a href="#">NM_007115.3</a>    | [38]      |
| EP2    | S: 5-CCACCTCATTCTCCTGGCTA-3<br>AS: 5-CGACAACAGAGGACTGAACG-3        | 93°C, 20 s, 62°C,<br>20 s72°C 30 s | 216                  | <a href="#">NM_000956.3</a>    | [39]      |
| HGF    | S: 5'-CTCACACCCGCTGGGAGTAC-3'<br>AS: 5'-TCCTTGACCTTGGATGCATTC-3'   | 93°C, 20 s, 62°C,<br>20 s72°C 30 s | 104                  | <a href="#">XM_011516115.2</a> | [40]      |
| GAPDH  | S: 5'-GACTCATGACCACAGTCCATGC-3'<br>AS: 5'-AGAGGCAGGGATGATGTTCTG-3' | 93°C, 20 s, 67°C,<br>20 s72°C 30 s | 112                  | <a href="#">NM_001289746.1</a> | [41]      |

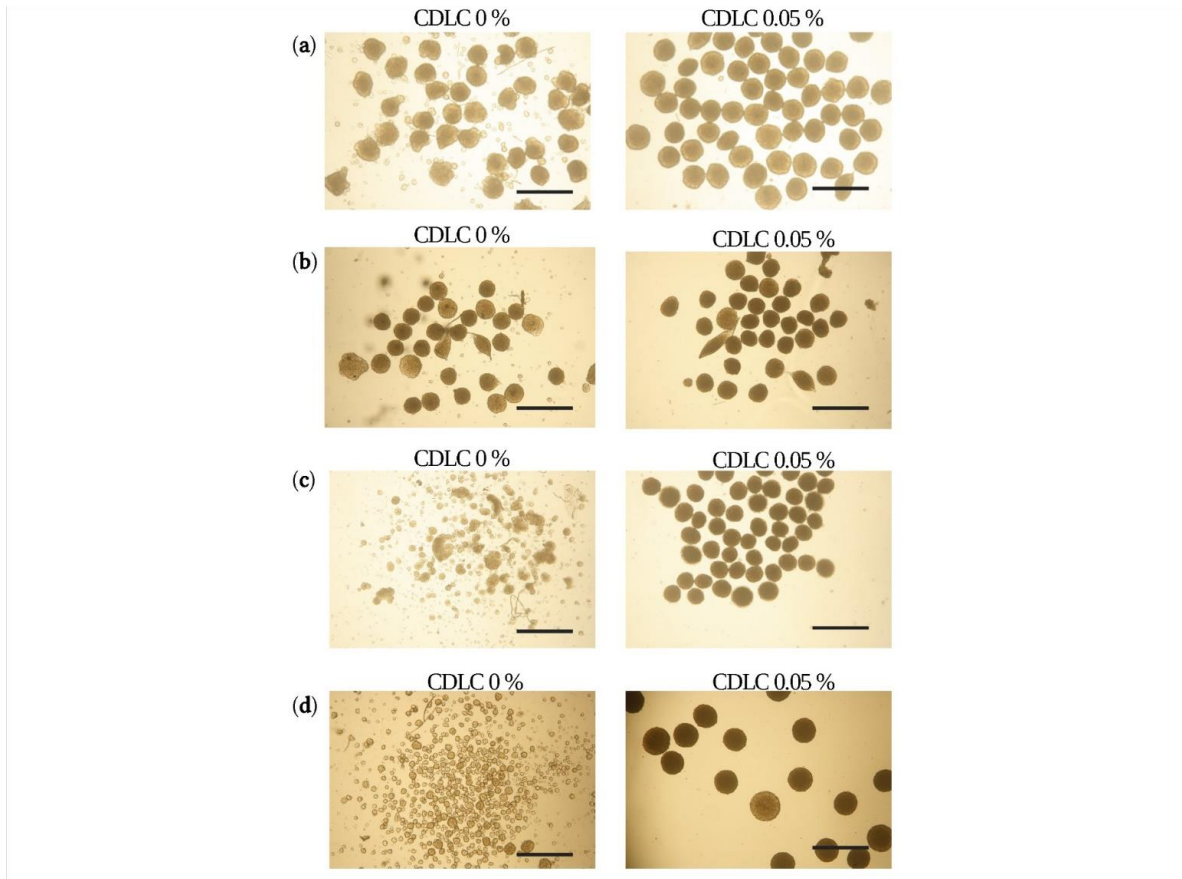

**Figure S1.** Production of uniform-size spheroids from MSC of different origin. (a) Aggregation of MSC from adipose tissue into spheroids (passage 5) (Scale bar, 600  $\mu\text{m}$ .); (b) Aggregation of MSC from bone marrow into spheroids (passage 5) (Scale bar, 600  $\mu\text{m}$ .); (c) Aggregation of eMSC after prolonged cultivation into spheroids (passage 22) (Scale bar, 600  $\mu\text{m}$ .); (d) Aggregation of eMSC cultured in SFM 1 into spheroids (Scale bar, 600  $\mu\text{m}$ .).

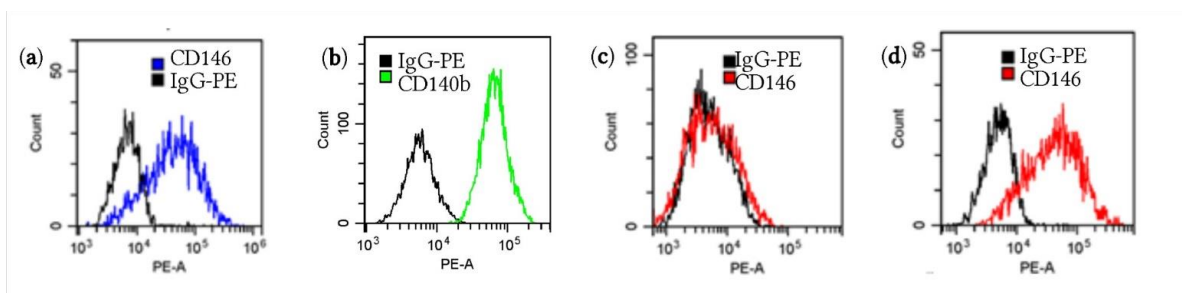

**Figure S2.** Expression of CD146 and CD 140b in eMSC. (a) High expression of CD 146 in monolayer culture; (b) High expression of CD 140b in monolayer culture; (c) Reduced expression of CD 146 in eMSC dissociated from spheroids; (d) Restoration of CD 146 expression in eMSC dissociated from spheroid and cultured in monolayer for 72 h.

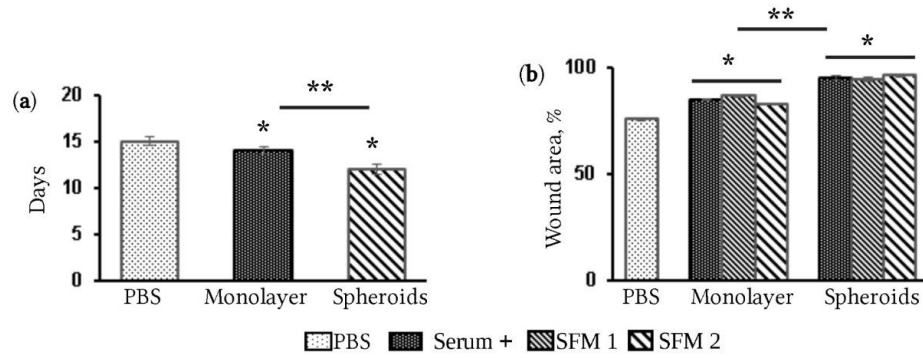

**Figure S3.** Wound healing dynamic in rat model. (a) Average time of wound closure after eMSC transplantation (average for all culture conditions). Data are shown as mean  $\pm$  SD, (n=9). Two-tailed Students t test was utilized for pairwise comparison. \*p<0.05 vs. PBS control; \*\*p<0.05 vs. monolayer cultured. (b) Wound area covered with new epithelium on day 10 in rats after transplantation. Data are shown as mean  $\pm$  SD, (n=9). The differences in wound closure were tested by Kruskal-Wallis H-test (non-parametric ANOVA) followed by post hoc pair-wise comparison using Dunn's test.. \*p<0.05 vs. PBS control, \*\*p<0.05 vs. monolayer cultured at the same conditions..
